# Supplementary material for: Using a holographic imager on a tethered balloon system for microphysical observations of boundary layer clouds
Source: Copernicus journal article supplement (doi:10.5194/amt-2019-210), 2019-07-24
Supplement: Supplementary file [file amt-2019-210-AC1-supplement.pdf]

Reviewer comments on **‘Using a holographic imager on a tethered balloon system for microphysical observations of boundary layer clouds’** by Fabiola Ramelli, Alexander Beck, Jan Henneberger, Ulrike Lohmann

*Response to Reviewer #1*

We would like to thank the anonymous referee for his/her valuable feedback and suggestions on the paper. We incorporated the suggestions within the revised manuscript, which substantially improved the quality of the manuscript. In the following, we will address the comments and show the changes in the revised manuscript.

**General comments**

- 1) In this manuscript, the authors present a holographic imaging system and its application to the analysis of low stratus properties in a case study from Switzerland. The paper is well-written, has a clear structure, and overall presents a good overview of the potential of the technique in studying boundary-layer clouds. The case study presented includes some very interesting aspects, the resulting hypotheses are summarized in a useful conceptual sketch. Any generalization would require further samples, but is beyond the scope of this paper focused on the introduction of the technique.
- 2) Language: The paper is legible and understandable, but riddled with small lingual errors that could probably be corrected quickly by someone fully proficient in English

**Detailed comments**

**1) 1-3: which cloud properties exactly?**

Thank you for pointing this out. We have added the cloud properties as follows (page 1, line 6-7): *“Based on a set of two-dimensional images, information about the phase-resolved particle size distribution, shape and spatial distribution can be obtained.”* More information about the cloud properties are provided in Sect. 1 and Sect. 3.1.

**2) 1-4: since holographic imagers are not a common type of instrument in large parts of the cloud community, please add a very short note on the principle in the abstract**

Thank you for pointing this out. We agree that holographic imagers are not a common type of instrument in large parts of the cloud community. We added a short description of the working principle in the abstract (page 1, line 4-8). Additionally, more information about the working principle of in-line holography can be found in Section 3.1.

**3) 1-10: scales have been mentioned in line 7 already, but in contradiction to this line**

Thank you for pointing this out. In the following study, only measurements down to the meter scale are presented. However, holographic imagers can provide information down to the millimeter scales if the spatial distribution of cloud particles is analyzed. The spatial

distribution of particles is not analyzed in the presented case study, but its potential is highlighted in Sect. 5.2.

**4) 1-11: I think an example is not needed in the abstract**

Thank you for the comment. The examples have been removed in the revised manuscript.

**5) 2-10: What do you mean by "most of the observations", and how did you reach this conclusion?**

Thank you for the comment. The term 'most' might be inadequate. We changed it accordingly to '*a large fraction of the observations*' (page 2, line 9). Moreover, we included some references, which used satellite observations to study boundary layer clouds.

**6) 2-13: is there a source for this (problems in lowermost km)?**

Thank you for pointing this out. We included two references describing the problem of surface clutter (page 2, line 14).

**7) 2-21: what is "ice shattering", and how does it impact measurements?**

Thank you for the comment. We included a short description of ice shattering and how it can impact the measurements (page 2, line 23-24): "*Ice shattering occurs if an ice crystal impacts the instrument tips or an inlet prior to entering the detection volume, which can result in a large number of small ice particles being a measurement artefact.*"

**8) 3-3: some additional info on the principles of holography would be useful here**

Thank you for the comment. We add a reference to Section 3 (page 3, line 11), where a more detailed description of the holographic instrument and holography is provided.

**9) 3-18: i.e. a low stratus cloud with its cloud base above ground? Please specify.**

Thank you for pointing this out. We removed the term high fog throughout the whole paper and replaced it by stratus clouds, which is the more general term. The term 'high fog' is mainly used in Switzerland and therefore introduced at the beginning of the case study (page 10, line 2).

**10) 3-20: how do you define inhomogeneity here?**

Thank you for the comment. We added a definition of inhomogeneity (page 3, line 30-31): "*Throughout this study, inhomogeneities are defined by the variability in the cloud droplet number concentration and cloud droplet size.*"

**11) 5-27: What do you use as training data?**

**12) 5-28: How are these parameters calculated?**

**13) 5-28: "such as" – please be specific here and list all parameters.**

Thank you for the comments. The comments 11-13 are addressed together. In order to provide more details about the particle classification, we extended the description as follows (page 5, line 27-33): “The resulting 2D shadowgraphs can be classified as cloud droplets, ice crystals and artefacts based on a set of parameters using supervised machine learning (e.g. Fugal et al. 2009, Beck et al. 2017, Touloupas et al. 2019). In the present study, a set of 6400 particles was classified manually, which served as a training data set on support vector machines. From the classification, the phase-resolved particle size distribution can be computed. The particle diameter is calculated based on the number of pixels (see also Sect. 3.3) and the number concentration can be computed from the particle counts within the well-defined sample volume. Only particles that exceed a size of 2x2 pixels (6  $\mu\text{m}$ ) are considered.”

**14) 9-5: Why was this particular situation chosen? In what ways is it representative or not?**

Thank you for the comment. The presented stratus cloud event is representative for a Bise situation, which often occurs during winter (page 10, line 3-4). Below, we added a figure from Wanner and Furger (1990), which summarizes the frequency of wind direction from radiosonde ascents launched from Payerne for the period 1981-1985. Based on their result, Bise occurred on 27% of the hours (see also Weber and Furger, 2001 or MeteoSwiss).

Wanner, H., & Furger, M. (1990). The bise—climatology of a regional wind north of the Alps. *Meteorology and Atmospheric Physics*, 43(1-4), 105-115.

Weber, R. O., & Furger, M. (2001). Climatology of near-surface wind patterns over Switzerland. *International Journal of Climatology: A Journal of the Royal Meteorological Society*, 21(7), 809-827.

MeteoSwiss:[https://www.meteoschweiz.admin.ch/content/dam/meteoswiss/de/service-und-publikationen/Publikationen/doc/Web\\_Wetterlagen\\_DE\\_low.pdf](https://www.meteoschweiz.admin.ch/content/dam/meteoswiss/de/service-und-publikationen/Publikationen/doc/Web_Wetterlagen_DE_low.pdf)

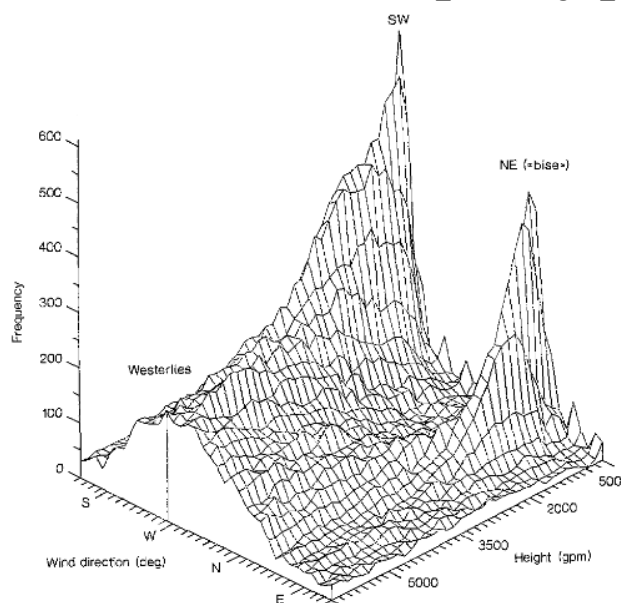

Fig. 4. Frequency of wind directions for 150m layers from 500 to 6200 m ASL for radiosonde ascents from Payerne for the period 1981–1985

**15) Figure 5: Please provide complete citation (author, year)**

Thank you for the comment. We added the year and the link where the online maps can be downloaded (<https://www.atlasderschweiz.ch/>) (caption Fig. 5).

**16) Table 2: Why is there no descent for profile number 9?**

Thank you for the comment. There is no profile 10/ no descent for profile number 9, because the battery of the instrument package was empty. We added a sentence to specify that (page 11, line 18-19): *“The battery of the instrument package was empty after profile 9, thus no observations were available afterwards.”*

**17) 11-18: What do you mean by classification in this context? Which classes?**

**18) 11-18: How is a classification by hand performed?**

Thank you for the comments. The particles are classified into three classes (cloud droplets, ice crystals and artefacts). We added the classes in the text and added a reference to Sect. 3.1 (page 12, line 4), where the classification process is described in more detail. Moreover, we exchanged the term ‘classification by hand’ with the term ‘classified manually (visual classification)’ (page 12, line 5).

**19) Section 4.3: How do you explain the nearly constant with height droplet diameters?**

Thank you for pointing this out. Figure 7.c) shows the mean vertical profile of the cloud droplet diameter. We agree that in the mean, the cloud droplet diameter looks rather constant. Here we include a figure that shows the individual vertical profiles of the cloud droplet diameter. It can be seen that in general the mean cloud droplet diameter increases with height. Profile 7 shows a lower mean diameter than the other profiles at altitudes above 1050 m.

Furthermore, it is also possible that there is a higher competition for water vapor with increasing height due to the increasing CDNC.

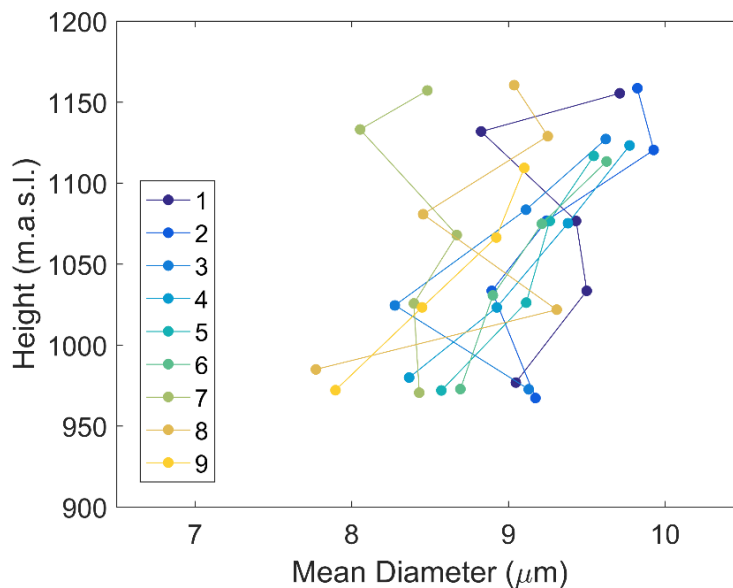

**20) 17-12: I think this statement is too general, given that only one case is analyzed.**

Thank you for the comment. We agree that this statement is too general, since the analysis is based on the observations of only one case study. We adapted the sentence in the following way (page 18, line 19-20): “*We found that stratus clouds can exhibit complex dynamic structures with microphysical signatures on different scales (Sect. 4.4).*”

**Technicalities**

Thank you for all the technical comments

- 1) page 1, line 1 (henceforth 1-1 etc.): aircrafts→aircraft  
Changed to aircraft (page 1, line 1)
- 2) 1-2: orographically diverse  
Changed (page 1, line 2)
- 3) 1-2: densely populated  
Changed (page 1, line 2)
- 4) 1-5: velocity-independent sample  
Changed (page 1, line 7)
- 5) 1-6: allows for observations  
Changed (page 1, line 9)
- 6) 1-7: scales  
We think that ‘scale’ should be used in singular in this case.
- 7) 1-9: above the ground were performed at temperatures...  
Changed (page 1, line 13)
- 8) 1-11: scales (No more comments on language from this point forward)  
We think that ‘scale’ should be used in singular in this case.
